# Supplementary material
Source: MDPI journal article supplement (https://www.mdpi.com/2311-7524/7/4/69)
Supplement: s1 [file s1]

**Table S1.** *P*-values for cultivar, year, and the interaction between year and cultivar for fruit yield components measured in an evaluation of 20 hybrid cultivars and two grafted entries of muskmelon in 2018 and 2019 at three sites in Pennsylvania.

|                 | Marketable number |             |                    | Marketable weight |             |                    | Unmarketable number |             |                    | Unmarketable weight |             |                    |
|-----------------|-------------------|-------------|--------------------|-------------------|-------------|--------------------|---------------------|-------------|--------------------|---------------------|-------------|--------------------|
|                 | western site      | center site | south-eastern site | western site      | center site | south-eastern site | western site        | center site | south-eastern site | western site        | center site | south-eastern site |
| Cultivar        | <0.0001           | <0.0001     | <0.0001            | <0.0001           | <0.0001     | <0.0001            | <0.0001             | <0.0001     | <0.0001            | 0.0412              | 0.0003      | <0.0001            |
| Year            | <0.0001           | 0.0306      | 0.1224             | <0.0001           | <0.0001     | 0.9742             | <0.0001             | 0.4597      | <0.0001            | 0.2702              | 0.4121      | <0.0001            |
| Year × cultivar | 0.0349            | 0.0222      | 0.0026             | 0.0094            | 0.0023      | 0.0017             | <0.0001             | 0.0038      | 0.0388             | 0.0435              | <0.0001     | 0.0087             |

**Table S2.** *P*-values for cultivar, year, and the interaction between year and cultivar for fruit physicochemical components measured in an evaluation of 14 hybrid cultivars and two grafted entries of muskmelon in 2018 and 2019 at the center site in Pennsylvania.

|                 | SSC (%) | Flesh pH | TA (%)  | SSC/TA | Juiciness (% water content) |
|-----------------|---------|----------|---------|--------|-----------------------------|
| Cultivar        | 0.3721  | 0.0020   | <0.0001 | 0.1800 | 0.0291                      |
| Year            | <0.0001 | <0.0001  | <0.0001 | 0.0016 | 0.0032                      |
| Year × cultivar | 0.0909  | 0.1727   | <0.0001 | 0.6363 | 0.0845                      |
